# Supplementary material for: Centronuclear Myopathy in Labrador Retrievers: A Recent Founder Mutation in the PTPLA Gene Has Rapidly Disseminated Worldwide
Source: PubMed Central journal article supplement (PMC3465307; doi:10.1371/journal.pone.0046408), 2012-10-05

Figure S1

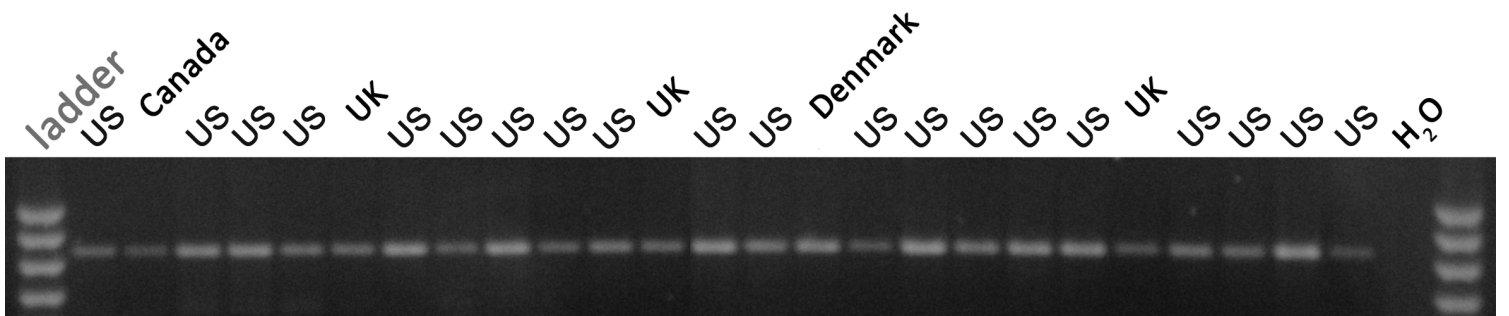

Supplement: pone.0046408.s001.pdf [file pone.0046408.s001.pdf]
