# Supplementary material for: Centronuclear Myopathy in Labrador Retrievers: A Recent Founder Mutation in the PTPLA Gene Has Rapidly Disseminated Worldwide
Source: PubMed Central journal article supplement (PMC3465307; doi:10.1371/journal.pone.0046408), 2012-10-05
Supplement: pone.0046408.s002.pdf [file pone.0046408.s002.pdf]

# Figure S2

|       |            |            |            |            |            |            |            |
|-------|------------|------------|------------|------------|------------|------------|------------|
|       | 1          |            |            |            |            |            | 70         |
| US-8  | CACACAAAGG | TTTTTTTTTT | TTTTTTAAAT | TTTTTTTTTT | AAATTTTTTT | TTTTTAATTT | TTTTTTATTT |
| US-9  | CACACAAAGG | TTTTTTTTTT | TTTTTTAAAT | TTTTTTTTTT | AAATTTTTTT | TTTTTAATTT | TTTTTTATTT |
| US-10 | CACACAAAGG | TTTTTTTTTT | TTTTTTAAAT | TTTTTTTTTT | AAATTTTTTT | TTTTTAATTT | TTTTTTATTT |
| US-13 | CACACAAAGG | TTTTTTTTTT | TTTTTTAAAT | TTTTTTTTTT | AAATTTTTTT | TTTTTAATTT | TTTTTTATTT |
| US-14 | CACACAAAGG | TTTTTTTTTT | TTTTTTAAAT | TTTTTTTTTT | AAATTTTTTT | TTTTTAATTT | TTTTTTATTT |
| US-15 | CACACAAAGG | TTTTTTTTTT | TTTTTTAAAT | TTTTTTTTTT | AAATTTTTTT | TTTTTAATTT | TTTTTTATTT |
| US-16 | CACACAAAGG | TTTTTTTTTT | TTTTTTAAAT | TTTTTTTTTT | AAATTTTTTT | TTTTTAATTT | TTTTTTATTT |
| DE-4  | CACACAAAGG | TTTTTTTTTT | TTTTTTAAAT | TTTTTTTTTT | AAATTTTTTT | TTTTTAATTT | TTTTTTATTT |
| DE-7  | CACACAAAGG | TTTTTTTTTT | TTTTTTAAAT | TTTTTTTTTT | AAATTTTTTT | TTTTTAATTT | TTTTTTATTT |
| UK-1  | CACACAAAGG | TTTTTTTTTT | TTTTTTAAAT | TTTTTTTTTT | AAATTTTTTT | TTTTTAATTT | TTTTTTATTT |
| DK-1  | CACACAAAGG | TTTTTTTTTT | TTTTTTAAAT | TTTTTTTTTT | AAATTTTTTT | TTTTTAATTT | TTTTTTATTT |
| FR-2  | CACACAAAGG | TTTTTTTTTT | TTTTTTAAAT | TTTTTTTTTT | AAATTTTTTT | TTTTTAATTT | TTTTTTATTT |
|       | 71         |            |            |            |            |            | 140        |
| US-8  | ATTTATGATA | GTCACACACA | GATAGAGAGA | GAGGCAGAGA | CACAGGCAGA | GGGAGAAGCA | GGCTCCATGC |
| US-9  | ATTTATGATA | GTCACACACA | GATAGAGAGA | GAGGCAGAGA | CACAGGCAGA | GGGAGAAGCA | GGCTCCATGC |
| US-10 | ATTTATGATA | GTCACACACA | GATAGAGAGA | GAGGCAGAGA | CACAGGCAGA | GGGAGAAGCA | GGCTCCATGC |
| US-13 | ATTTATGATA | GTCACACACA | GATAGAGAGA | GAGGCAGAGA | CACAGGCAGA | GGGAGAAGCA | GGCTCCATGC |
| US-14 | ATTTATGATA | GTCACACACA | GATAGAGAGA | GAGGCAGAGA | CACAGGCAGA | GGGAGAAGCA | GGCTCCATGC |
| US-15 | ATTTATGATA | GTCACACACA | GATAGAGAGA | GAGGCAGAGA | CACAGGCAGA | GGGAGAAGCA | GGCTCCATGC |
| US-16 | ATTTATGATA | GTCACACACA | GATAGAGAGA | GAGGCAGAGA | CACAGGCAGA | GGGAGAAGCA | GGCTCCATGC |
| DE-4  | ATTTATGATA | GTCACACACA | GATAGAGAGA | GAGGCAGAGA | CACAGGCAGA | GGGAGAAGCA | GGCTCCATGC |
| DE-7  | ATTTATGATA | GTCACACACA | GATAGAGAGA | GAGGCAGAGA | CACAGGCAGA | GGGAGAAGCA | GGCTCCATGC |
| UK-1  | ATTTATGATA | GTCACACACA | GATAGAGAGA | GAGGCAGAGA | CACAGGCAGA | GGGAGAAGCA | GGCTCCATGC |
| DK-1  | ATTTATGATA | GTCACACACA | GATAGAGAGA | GAGGCAGAGA | CACAGGCAGA | GGGAGAAGCA | GGCTCCATGC |
| FR-2  | ATTTATGATA | GTCACACACA | GATAGAGAGA | GAGGCAGAGA | CACAGGCAGA | GGGAGAAGCA | GGCTCCATGC |
|       | 141        |            |            |            |            |            | 210        |
| US-8  | ACCGGGAGCC | CGACGTGGGA | CTCGATCCCG | GGTCTCCAGG | ATCGCGCCCT | GGGCCAAAGG | CAGGCGCCAA |
| US-9  | ACCGGGAGCC | CGACGTGGGA | CTCGATCCCG | GGTCTCCAGG | ATCGCGCCCT | GGGCCAAAGG | CAGGCGCCAA |
| US-10 | ACCGGGAGCC | CGACGTGGGA | CTCGATCCCG | GGTCTCCAGG | ATCGCGCCCT | GGGCCAAAGG | CAGGCGCCAA |
| US-13 | ACCGGGAGCC | CGACGTGGGA | CTCGATCCCG | GGTCTCCAGG | ATCGCGCCCT | GGGCCAAAGG | CAGGCGCCAA |
| US-14 | ACCGGGAGCC | CGACGTGGGA | CTCGATCCCG | GGTCTCCAGG | ATCGCGCCCT | GGGCCAAAGG | CAGGCGCCAA |
| US-15 | ACCGGGAGCC | CGACGTGGGA | CTCGATCCCG | GGTCTCCAGG | ATCGCGCCCT | GGGCCAAAGG | CAGGCGCCAA |
| US-16 | ACCGGGAGCC | CGACGTGGGA | CTCGATCCCG | GGTCTCCAGG | ATCGCGCCCT | GGGCCAAAGG | CAGGCGCCAA |
| DE-4  | ACCGGGAGCC | CGACGTGGGA | CTCGATCCCG | GGTCTCCAGG | ATCGCGCCCT | GGGCCAAAGG | CAGGCGCCAA |
| DE-7  | ACCGGGAGCC | CGACGTGGGA | CTCGATCCCG | GGTCTCCAGG | ATCGCGCCCT | GGGCCAAAGG | CAGGCGCCAA |
| UK-1  | ACCGGGAGCC | CGACGTGGGA | CTCGATCCCG | GGTCTCCAGG | ATCGCGCCCT | GGGCCAAAGG | CAGGCGCCAA |
| DK-1  | ACCGGGAGCC | CGACGTGGGA | CTCGATCCCG | GGTCTCCAGG | ATCGCGCCCT | GGGCCAAAGG | CAGGCGCCAA |
| FR-2  | ACCGGGAGCC | CGACGTGGGA | CTCGATCCCG | GGTCTCCAGG | ATCGCGCCCT | GGGCCAAAGG | CAGGCGCCAA |
|       | 211        |            |            |            |            |            | 254        |
| US-8  | ACCGCTGCGC | CACCCAGGGA | TCCC       | CACAC      | AAAGGTTT   | AT         | ATAA       |
| US-9  | ACCGCTGCGC | CACCCAGGGA | TCCC       | CACAC      | AAAGGTTT   | AT         | ATAA       |
| US-10 | ACCGCTGCGC | CACCCAGGGA | TCCC       | CACAC      | AAAGGTTT   | AT         | ATAA       |
| US-13 | ACCGCTGCGC | CACCCAGGGA | TCCC       | CACAC      | AAAGGTTT   | AT         | ATAA       |
| US-14 | ACCGCTGCGC | CACCCAGGGA | TCCC       | CACAC      | AAAGGTTT   | AT         | ATAA       |
| US-15 | ACCGCTGCGC | CACCCAGGGA | TCCC       | CACAC      | AAAGGTTT   | AT         | ATAA       |
| US-16 | ACCGCTGCGC | CACCCAGGGA | TCCC       | CACAC      | AAAGGTTT   | AT         | ATAA       |
| DE-4  | ACCGCTGCGC | CACCCAGGGA | TCCC       | CACAC      | AAAGGTTT   | AT         | ATAA       |
| DE-7  | ACCGCTGCGC | CACCCAGGGA | TCCC       | CACAC      | AAAGGTTT   | AT         | ATAA       |
| UK-1  | ACCGCTGCGC | CACCCAGGGA | TCCC       | CACAC      | AAAGGTTT   | AT         | ATAA       |
| DK-1  | ACCGCTGCGC | CACCCAGGGA | TCCC       | CACAC      | AAAGGTTT   | AT         | ATAA       |
| FR-2  | ACCGCTGCGC | CACCCAGGGA | TCCC       | CACAC      | AAAGGTTT   | AT         | ATAA       |
