# Supplementary material for: Centronuclear Myopathy in Labrador Retrievers: A Recent Founder Mutation in the PTPLA Gene Has Rapidly Disseminated Worldwide
Source: PubMed Central journal article supplement (PMC3465307; doi:10.1371/journal.pone.0046408), 2012-10-05
Supplement: pone.0046408.s004.pdf [file pone.0046408.s004.pdf]

Table S1

| # Dog | Country | Unique Identifier | Clinical report                                                     | Age of biopsy (months) | Histopathological features                            | Diagnosis                                      | Pedigree information                                                                                                                                                                            | Genotype (PTPLA locus) |
|-------|---------|-------------------|---------------------------------------------------------------------|------------------------|-------------------------------------------------------|------------------------------------------------|-------------------------------------------------------------------------------------------------------------------------------------------------------------------------------------------------|------------------------|
| 1     | USA     | US-3              | WK, HypoT                                                           |                        | -                                                     | HMLR                                           | Compatible with AR transmission (see Fig. 2B)                                                                                                                                                   | cnm/cnm                |
| 2     | USA     | US-7              | -                                                                   | 5                      | AF, ARF, rare NF                                      | Neuromyopathy group of HMLR                    | -                                                                                                                                                                                               | cnm/cnm                |
| 3     | USA     | US-8              | GA, Cervical WK, HypoT, no PR                                       | 2                      | Neurogenic atrophy                                    | HMLR                                           | -                                                                                                                                                                                               | cnm/cnm                |
| 4     | USA     | US-9              | -                                                                   | 3                      | AF, fibrosis, FatI, "Wallerian-like" degeneration, NR | Chronic nonInf myopathy, early neuropathy      | -                                                                                                                                                                                               | cnm/cnm                |
| 5     | USA     | US-10             | -                                                                   | -                      | AF, ARF, FSV, type 1P, rare NF                        | NonInf myopathy consistent with HMLR           | -                                                                                                                                                                                               | cnm/cnm                |
| 6     | USA     | US-11             | -                                                                   | -                      | type 1P, no other abnormality                         | HMLR                                           | -                                                                                                                                                                                               | +/cnm                  |
| 7     | USA     | US-12             | -                                                                   | 7                      | AF, ARF, FSV                                          | NonInf myopathy consistent with HMLR           | -                                                                                                                                                                                               | cnm/cnm                |
| 8     | USA     | US-13             | -                                                                   | 6                      | AF, ARF, FSV, type 1P, several NF                     | NonInf myopathy consistent with HMLR           | -                                                                                                                                                                                               | cnm/cnm                |
| 9     | USA     | US-14             | GA, WK, HypoT, no PR, abnormal EMG                                  | 12                     | FSV, rare NF                                          | NonInf myopathy consistent with HMLR           | -                                                                                                                                                                                               | cnm/cnm                |
| 10    | USA     | US-15             | -                                                                   | 4                      | AF, FSV                                               | NonInf myopathy consistent with HMLR           | -                                                                                                                                                                                               | cnm/cnm                |
| 11    | USA     | US-16             | -                                                                   | 7                      | AF, ARF, FSV, FatI                                    | NonInf myopathy consistent with HMLR           | -                                                                                                                                                                                               | cnm/cnm                |
| 12    | USA     | US-17             | -                                                                   | 6                      | ARF, FSV, type 1P                                     | NonInf myopathy consistent with HMLR           | -                                                                                                                                                                                               | cnm/cnm                |
| 13    | USA     | US-18             | -                                                                   | 4                      | AF, ARF, FSV, type 1P                                 | NonInf myopathy consistent with HMLR           | -                                                                                                                                                                                               | cnm/cnm                |
| 14    | USA     | US-19             | -                                                                   | 7                      | AF, ARF, FSV                                          | Neuromyopathy group of HMLR                    | -                                                                                                                                                                                               | cnm/cnm                |
| 15    | USA     | US-20             | GA, WK, no PR                                                       | 3                      | AF, FSV                                               | HMLR                                           | -                                                                                                                                                                                               | cnm/cnm                |
| 16    | Germany | DE-1              | Severely affected, fibrillation potentials, post-stimulations waves | -                      | FSV, NF, no atrophy, type 1P                          | Labrador myopathy                              | Swiss pedigree                                                                                                                                                                                  | cnm/cnm                |
| 17    | Germany | DE-2              |                                                                     | 5                      | ARF, FSV, NF, focal atrophy, type 1P                  | HMLR                                           |                                                                                                                                                                                                 | cnm/cnm                |
| 18    | Germany | DE-3              | Traumatic lesion of the plexus brachialis                           | -                      |                                                       | Neuropathy                                     | -                                                                                                                                                                                               | +/+                    |
| 19    | Germany | DE-4              | Apathy, low appetite, HypoT                                         | 5                      | ARF, FSV, NF, focal atrophy in type I and II fibers   | Chronic necrotic myopathy consistent with HMLR | <u>Grandfather</u> : UK champion<br><u>Great-grandparents</u> : Four out of 8 were UK champions                                                                                                 | cnm/cnm                |
| 20    | Germany | DE-5              | WK, symptoms of myasthenia gravis                                   | 16                     | Few ARF, light FSV, NF no InternN                     | Chronic neuromyopathy                          | <u>Grandparents</u> : Belgian and Swedish champions<br><u>Great-grandparents</u> : Belgian and Norwegian champions<br><u>Great-great-grandparents</u> : US, UK, Swedish and Norwegian champions | +/+                    |
| 21    | Germany | DE-6              | -                                                                   | -                      | Focal neurogenic lesions                              | Neuromyopathy                                  | -                                                                                                                                                                                               | +/+                    |
| 22    | Germany | DE-7              | Affected                                                            | -                      |                                                       | Muscular dystrophy                             | -                                                                                                                                                                                               | cnm/cnm                |
| 23    | Germany | DE-8              | Normal                                                              | -                      |                                                       | Labrador myopathy                              | Swiss pedigree                                                                                                                                                                                  | +/+                    |
| 24    | Germany | DE-9              | Normal                                                              | -                      |                                                       | Labrador myopathy                              | Swiss pedigree                                                                                                                                                                                  | +/+                    |
| 25    | Germany | DE-10             | Affected                                                            | -                      |                                                       | Labrador myopathy                              | -                                                                                                                                                                                               | +/+                    |
| 26    | Germany | DE-11             | Lameness                                                            | -                      |                                                       | Labrador myopathy                              | -                                                                                                                                                                                               | +/+                    |
| 27    | UK      | UK-1              | -                                                                   |                        |                                                       | HMLR                                           | -                                                                                                                                                                                               | cnm/cnm                |
| 28    | UK      | UK-2              | -                                                                   |                        |                                                       | HMLR                                           | -                                                                                                                                                                                               | cnm/cnm                |
| 29    | UK      | UK-3              | -                                                                   |                        |                                                       | HMLR                                           | -                                                                                                                                                                                               | +/+                    |
| 30    | Denmark | DK-1              | Low weight, no PR                                                   | 4                      | -                                                     | HMLR                                           | -                                                                                                                                                                                               | cnm/cnm                |
| 31    | France  | FR-2              | GA, Cervical WK, fatigability, HypoT, hypotonicity, no PR           | 5                      | AF, ARF, FSV, NF, type 1P, few InternN, FatI          | CNM                                            | <u>Father</u> : UK champion<br><u>Paternal grandparents</u> : UK<br><u>Great-grandparents</u> : All (8/8) from UK                                                                               | cnm/cnm                |
| 32    | France  | FR-3              | Fatigability                                                        | 5                      | AF, FSV, type 1P, few InternN                         | CNM                                            | -                                                                                                                                                                                               | cnm/cnm                |
