# Supplementary material for: Centronuclear Myopathy in Labrador Retrievers: A Recent Founder Mutation in the PTPLA Gene Has Rapidly Disseminated Worldwide
Source: PubMed Central journal article supplement (PMC3465307; doi:10.1371/journal.pone.0046408), 2012-10-05
Supplement: pone.0046408.s005.pdf [file pone.0046408.s005.pdf]

# Table S2

|               | <b>+/+</b>            | <b>+/cnm</b>        | <b>cnm/cnm</b>    | <b>Total</b> |
|---------------|-----------------------|---------------------|-------------------|--------------|
| <b>Male</b>   | <b>2 516</b><br>82.1% | <b>513</b><br>16.7% | <b>35</b><br>1.1% | <b>3 064</b> |
| <b>Female</b> | <b>3 657</b><br>83.8% | <b>660</b><br>15.1% | <b>45</b><br>1.0% | <b>4 362</b> |
| <b>Total</b>  | <b>6 173</b>          | <b>1 173</b>        | <b>80</b>         | <b>7 426</b> |
