# Supplementary material for: Centronuclear Myopathy in Labrador Retrievers: A Recent Founder Mutation in the PTPLA Gene Has Rapidly Disseminated Worldwide
Source: PubMed Central journal article supplement (PMC3465307; doi:10.1371/journal.pone.0046408), 2012-10-05
Supplement: pone.0046408.s006.pdf [file pone.0046408.s006.pdf]

# Table S3

|                  | <b>+/+</b>                   | <b>+/cnm</b>               | <b>cnm/cnm</b>           | <b>Total</b> |
|------------------|------------------------------|----------------------------|--------------------------|--------------|
| <b>Black</b>     | <b>3 604</b><br><i>81.6%</i> | <b>771</b><br><i>17.4%</i> | <b>39</b><br><i>0.9%</i> | <b>4 414</b> |
| <b>Yellow</b>    | <b>1 682</b><br><i>87.6%</i> | <b>219</b><br><i>11.4%</i> | <b>21</b><br><i>1.1%</i> | <b>1 922</b> |
| <b>Chocolate</b> | <b>848</b><br><i>81.9%</i>   | <b>171</b><br><i>16.6%</i> | <b>17</b><br><i>1.6%</i> | <b>1 036</b> |
| <b>Unknown</b>   | <b>39</b>                    | <b>12</b>                  | <b>3</b>                 | <b>54</b>    |
| <b>Total</b>     | <b>6 173</b>                 | <b>1 173</b>               | <b>80</b>                | <b>7 426</b> |
