# Supplementary material for: Centronuclear Myopathy in Labrador Retrievers: A Recent Founder Mutation in the PTPLA Gene Has Rapidly Disseminated Worldwide
Source: PubMed Central journal article supplement (PMC3465307; doi:10.1371/journal.pone.0046408), 2012-10-05
Supplement: pone.0046408.s007.pdf [file pone.0046408.s007.pdf]

# Table S4

## CFA2: 18.0-22.16 Mb

| SNP_Id         | Position bp | Name on Figures | Distance between SNPs | Cumulated distance from PTPLA to centromere | SNP variation |
|----------------|-------------|-----------------|-----------------------|---------------------------------------------|---------------|
| BICF2P407690   | 18 009 723  | 18010           | 1 417 040             | 4 185 659                                   | [A/G]         |
| BICF2S23117062 | 19 426 763  | 19427           | 1 259 933             | 2 768 619                                   | [A/G]         |
| BICF2P768278   | 20 686 696  | 20687           | 688 617               | 1 508 686                                   | [C/A]         |
| BICF2S23334088 | 21 375 313  | 21375           | 298 510               | 820 069                                     | [C/T]         |
| BICF2S23256430 | 21 673 823  | 21674           | 60 774                | 521 559                                     | [C/T]         |
| BICF2S23717225 | 21 734 597  | 21735           | 28 755                | 460 785                                     | [T/C]         |
| BICF2P375846   | 21 763 352  | 21763           | 402 360               | 432 030                                     | [T/C]         |
| BICF2P583542   | 22 165 712  | 22166           | 0                     | 29 670                                      | [G/T]         |

## PTPLA: 22.19-22.22 Mb

## CFA2: 22.25-27.05 Mb

| SNP_Id         | Position bp | Name on Figures | Distance between SNPs | Cumulated distance from PTPLA to telomere | SNP variation |
|----------------|-------------|-----------------|-----------------------|-------------------------------------------|---------------|
| BICF2P642478   | 22 252 747  | 22253           | 0                     | 36 911                                    | [T/C]         |
| BICF2S23136859 | 22 733 549  | 22734           | 480 802               | 517 713                                   | [C/G]         |
| BICF2S23329178 | 23 652 879  | 23653           | 919 330               | 1 437 043                                 | [A/G]         |
| BICF2S23351046 | 24 518 409  | 24518           | 865 530               | 2 302 573                                 | [T/C]         |
| BICF2S23335689 | 24 994 400  | 24994           | 475 991               | 2 778 564                                 | [C/T]         |
| BICF2S2361673  | 25 966 952  | 25967           | 972 552               | 3 751 116                                 | [C/A]         |
| BICF2S23249211 | 27 051 266  | 27051           | 1 084 314             | 4 835 430                                 | [A/G]         |
